# Supplementary material for: Bio-Potency and Molecular Docking Studies of Isolated Compounds from Grewia optiva J.R. Drumm. ex Burret
Source: PubMed Central journal article supplement (PMC8036409; doi:10.3390/molecules26072019), 2021-04-01
Supplement: molecules-26-02019-s001.pdf [file molecules-26-02019-s001.pdf]

## Supplementary Material

# Bio-potency and molecular docking studies of isolated compounds from *Grewia optiva* J.R. Drumm. ex Burret

**Wasim Ul Bari<sup>1</sup>, Najeeb Ur Rehman<sup>2</sup>, Ajmal Khan<sup>2</sup>, Ye Yuan<sup>3</sup>, Mark A. T. Blaskovich<sup>3</sup>, Zyta M. Ziora<sup>3</sup>, Muhammad Zahoor<sup>1,4</sup>, Sumaira Naz<sup>4</sup>, Riaz Ullah<sup>5</sup>, Siddique A. Ansari<sup>6</sup>, Hafiz Majid Mahmood<sup>7</sup> and Ahmed Bari<sup>8</sup>, and Ahmed Al-Harrasi<sup>2</sup>**

<sup>1</sup> Department of Chemistry, University of Malakand, Chakdara, Dir Lower, 18800 KPK, Pakistan. Email: wasimouch4080@gmail.com

<sup>2</sup> Natural and Medical Sciences Research Center, University of Nizwa, Birkat Al Mauz, Sultanate of Oman. Email: najeeb@unizwa.edu.om, ajmalchemist@yahoo.com

<sup>3</sup> Centre for Superbug Solutions, Institute for Molecular Bioscience, The University of Queensland, Brisbane, Queensland, 4072, Australia 4072. Email: ye.yuan1@uq.net.au, m.blaskovich@imb.uq.edu.au, z.ziora@uq.edu.au

<sup>4</sup> Department of Biochemistry, University of Malakand, Chakdara, Dir Lower, 18800 KPK, Pakistan. Email: mohammadzahoorus@yahoo.com sumaira.biochem@gmail.com

<sup>5</sup> Department of Pharmacognosy (MAPPRC), College of Pharmacy, King Saud University, Ri-yadh, Saudi Arabia. Email: rullah@ksu.edu.sa

<sup>6</sup> Department of Pharmaceutical Chemistry, College of Pharmacy, King Saud University, Riyadh, Saudi Arabia. Email: sansari@ksu.edu.sa

<sup>7</sup> Department of Pharmacology, College of Pharmacy, King Saud University, Riyadh, Saudi Arabia. Email: harshad@ksu.edu.sa

<sup>8</sup> Department of Soil Sciences, College of Food and agriculture Sciences, King Saud University PO box 2460, Riyadh 11451, Saudi Arabia. Email: abari@ksu.edu.sa

\* Correspondence: author: Dr. Muhammad Zahoor, Email: mohammadzahoorus@yahoo.com

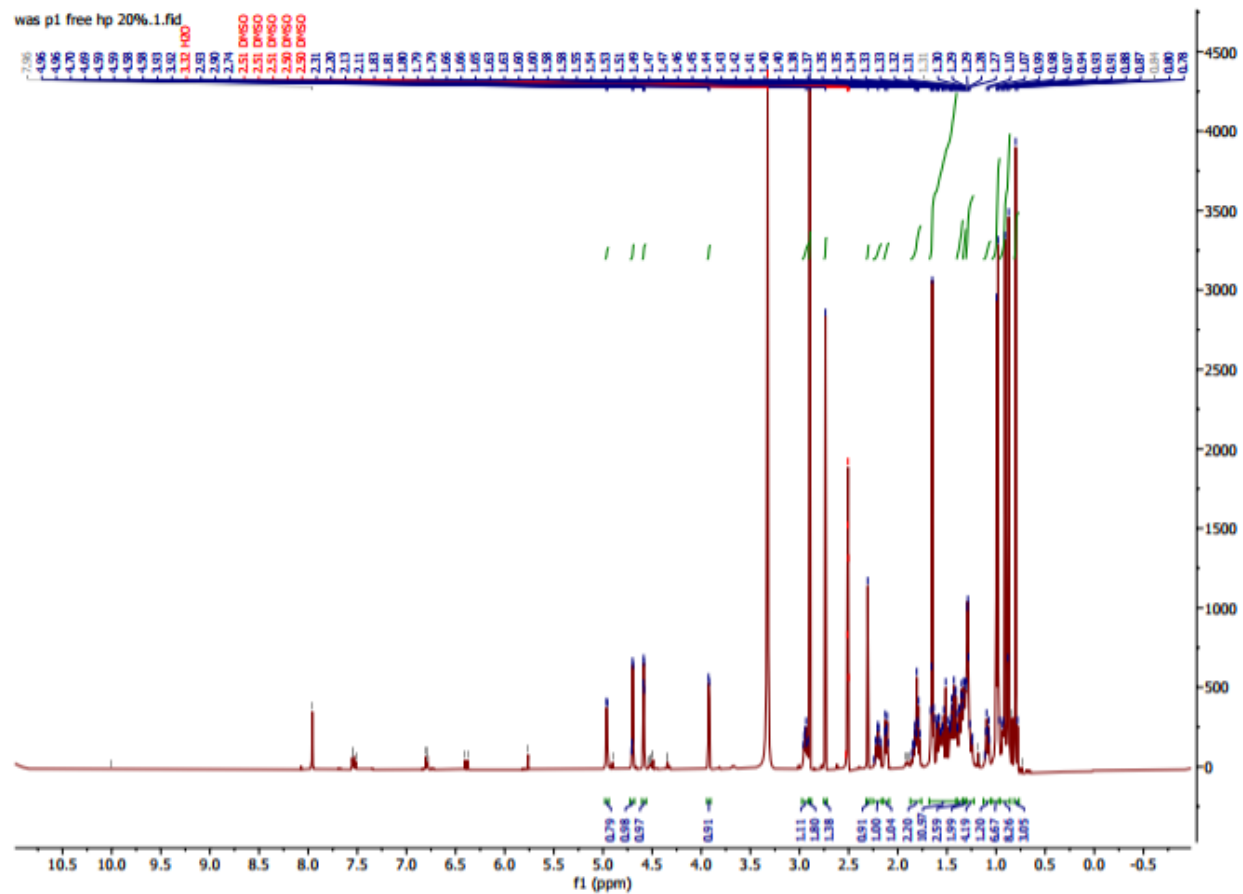

Figure S1: Proton NMR of compound IX

was p1 free hp 20%.2.fid

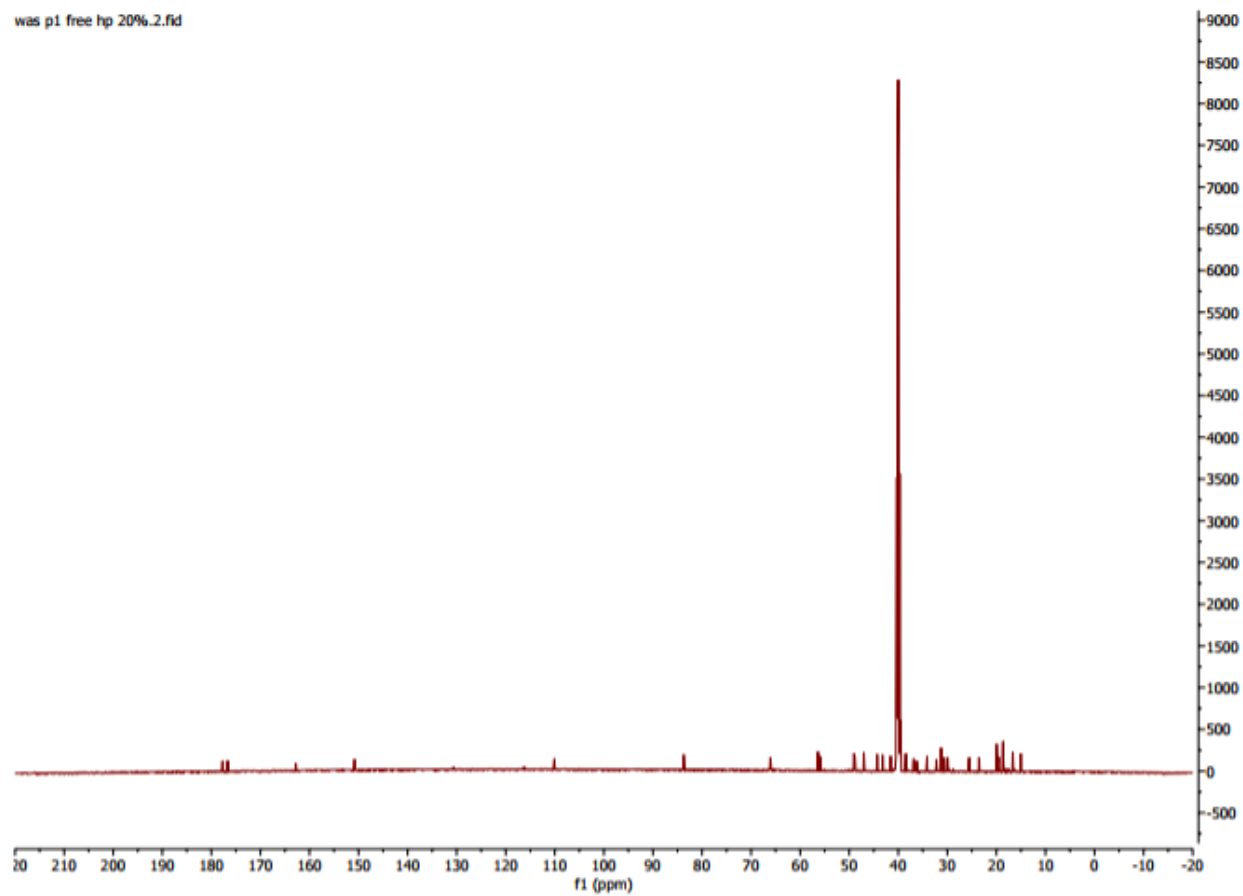

**Figure S2:** Carbon-13 NMR of compound **IX**

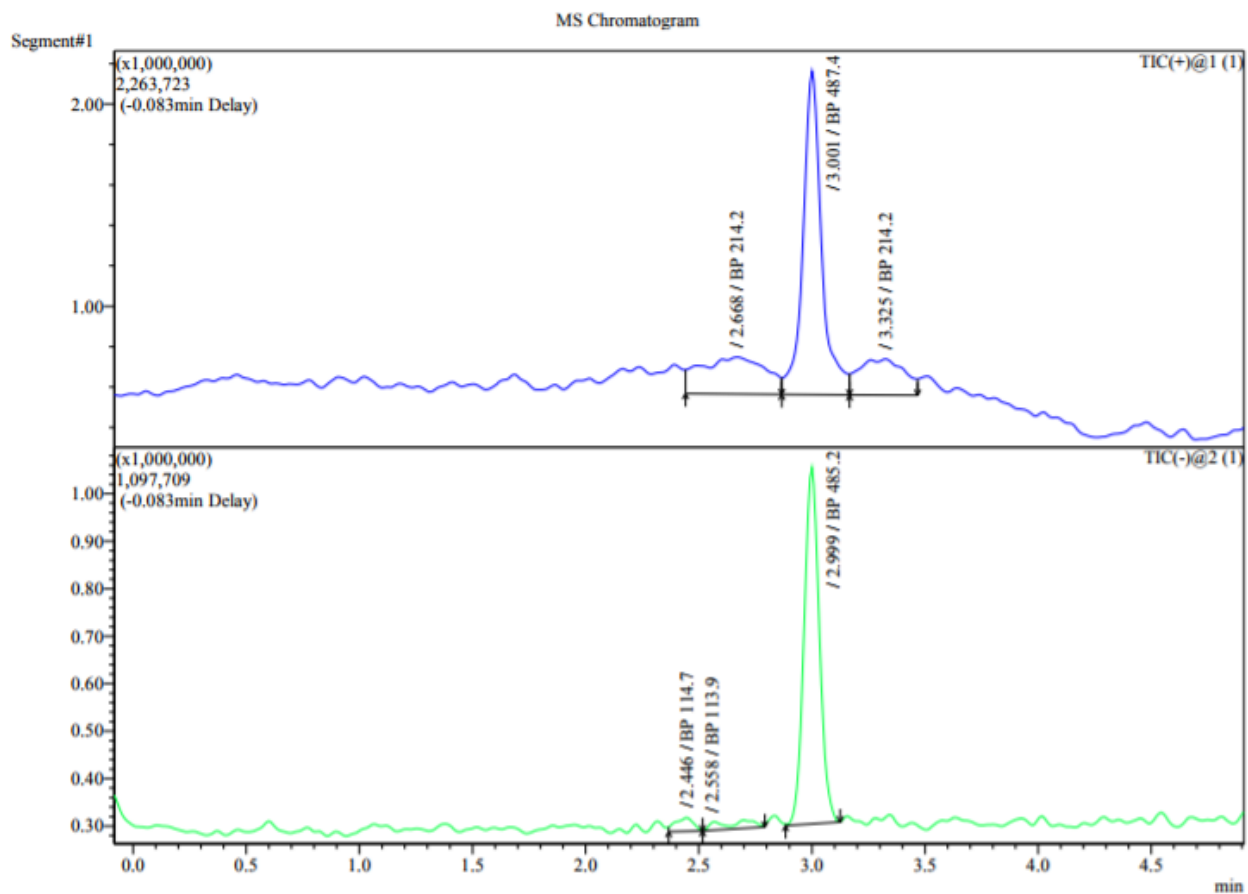

**Figure S3:** LC-MS chromatogram of compound IX

wasim 21.1.fid  
Proton

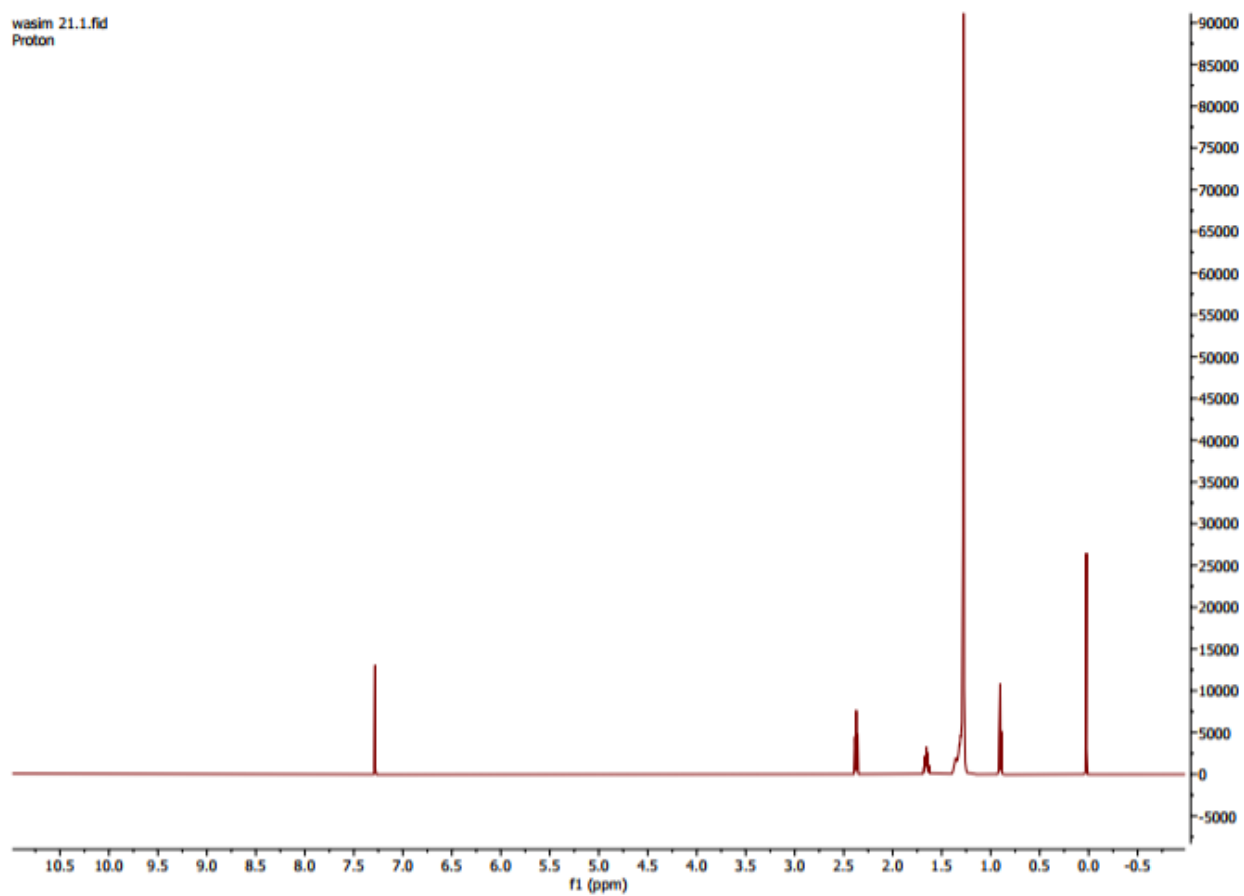

**Figure S4:** Proton NMR of compound X

wasim 21.6.fid  
C13

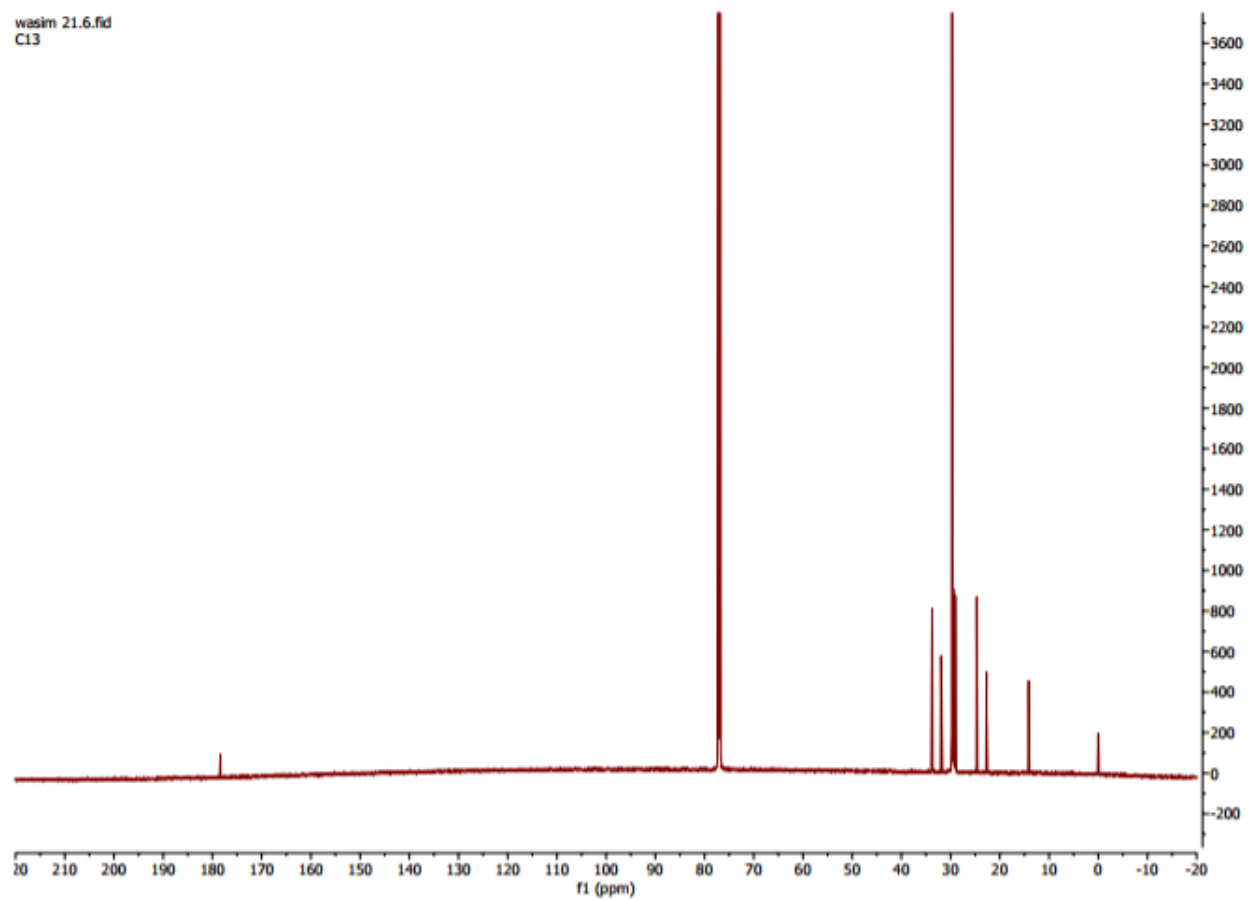

**Figure S5:** Carbon-13 NMR of compound X

Dr. Najeeb/17A/DMSO  
PROTON

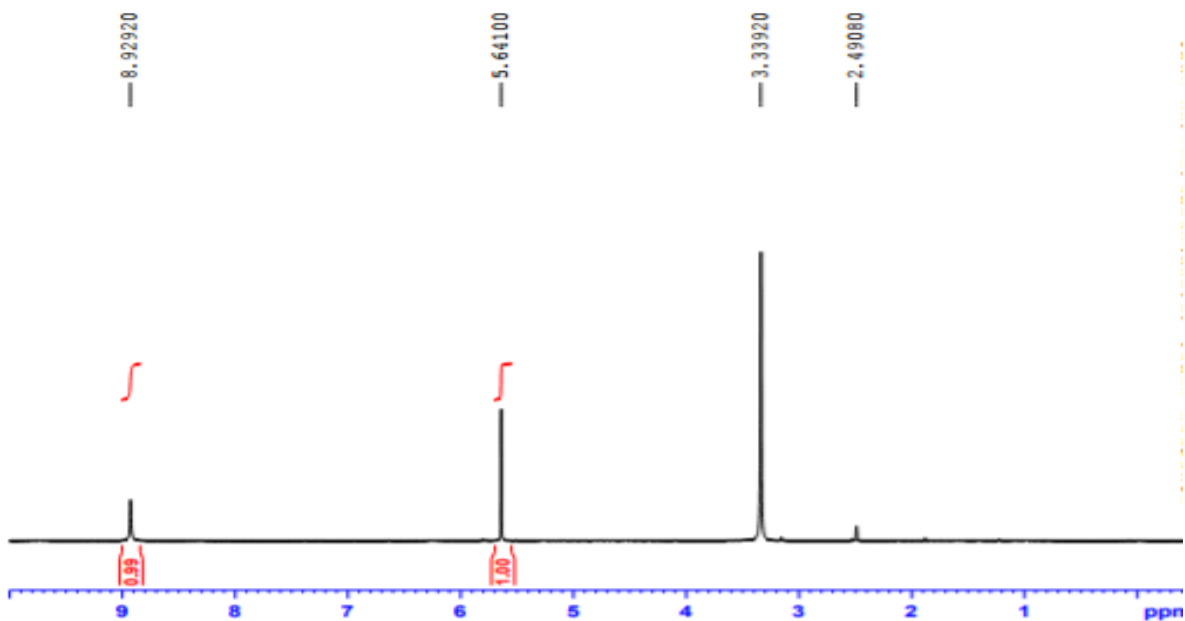

Figure S6: Proton NMR of compound XI

Dr. Najeeb/17A/DMSO  
C13CPD

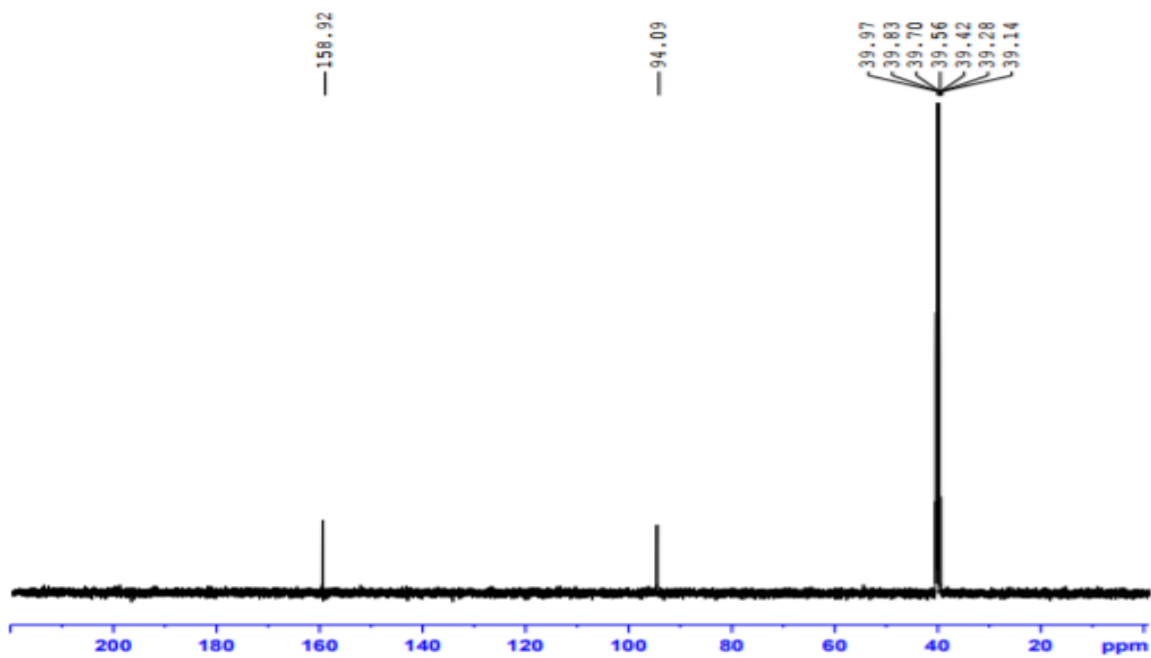

Figure S7: Carbon-13 NMR of compound XI

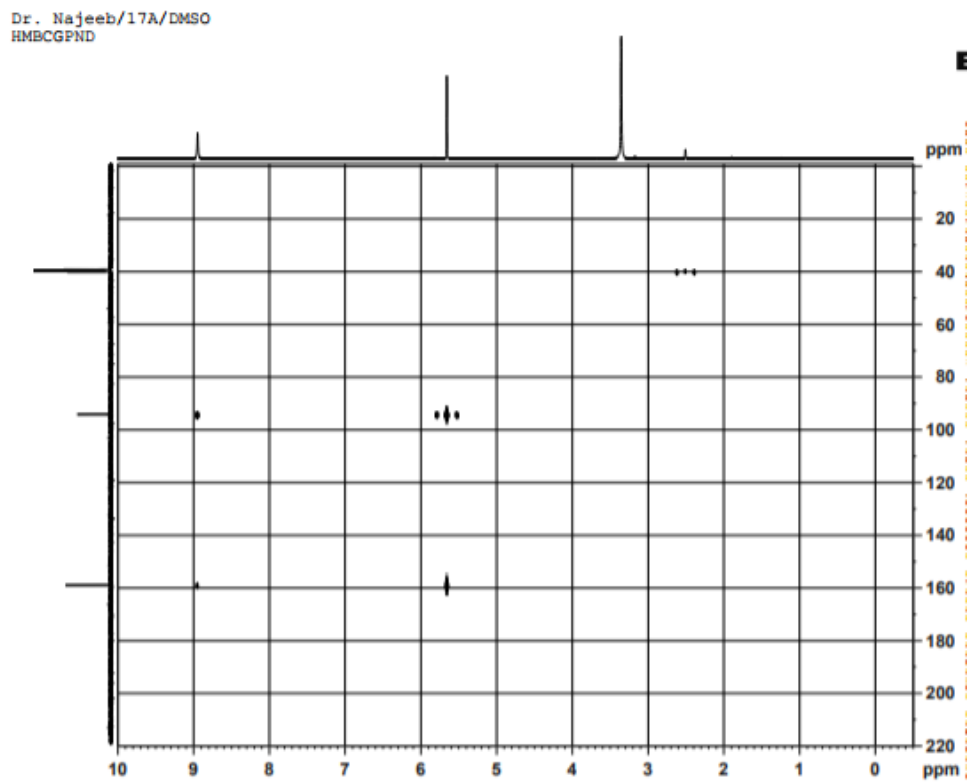

Figure S8: HMBC of compound XI

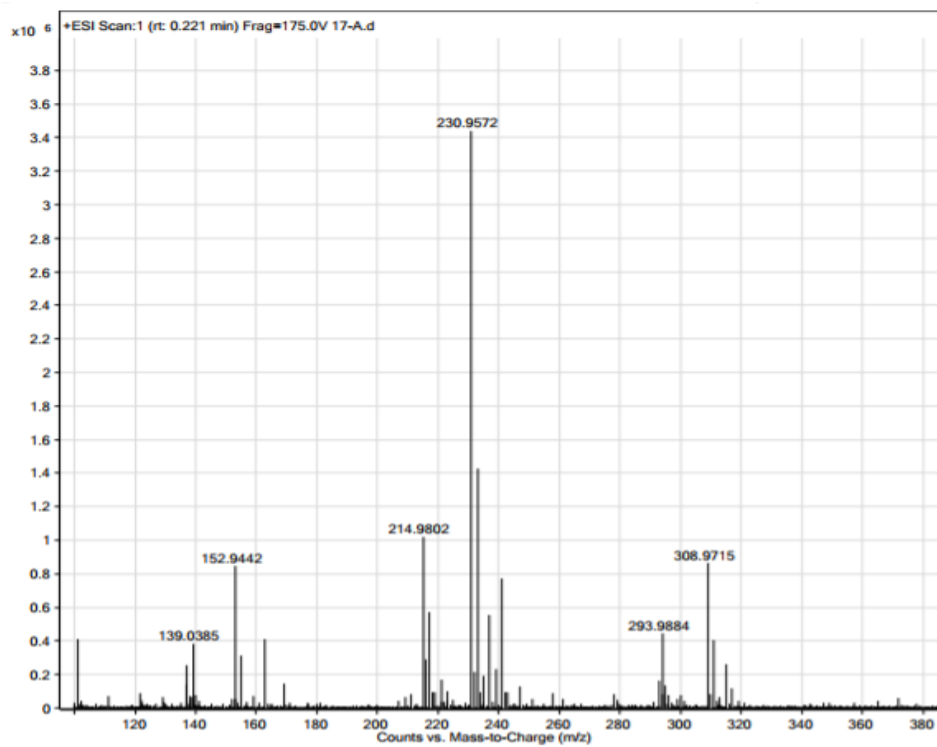

Figure S9: Mass spectra of compound XI



wasim p22

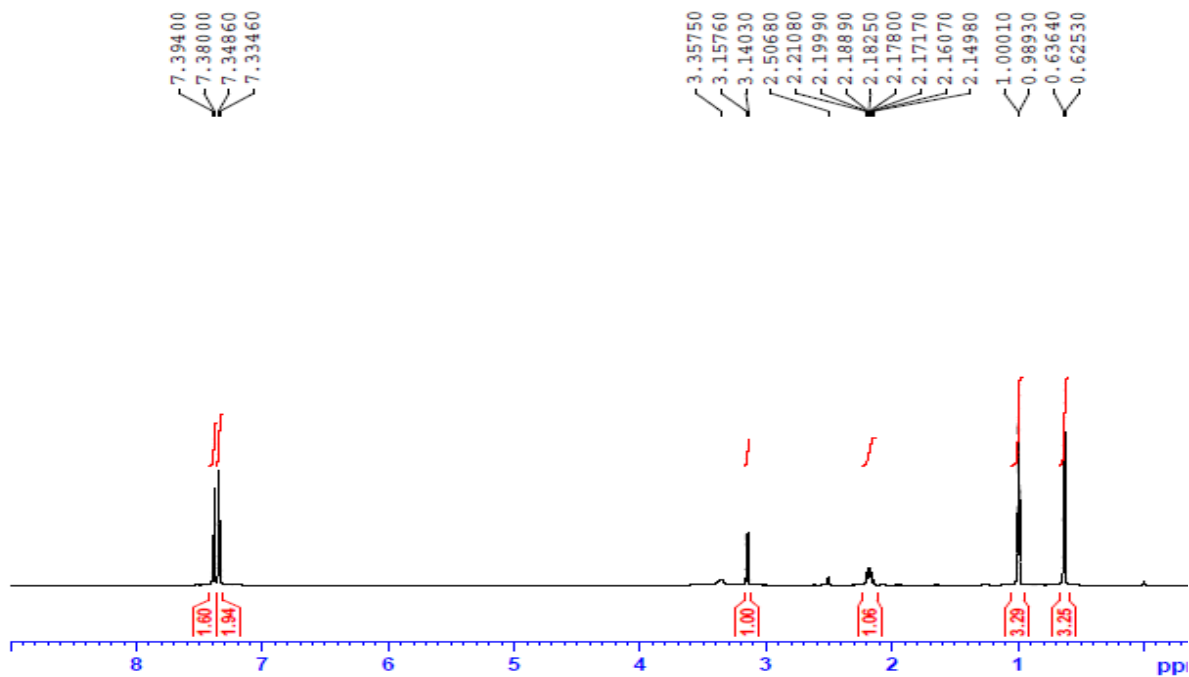

wasim p22

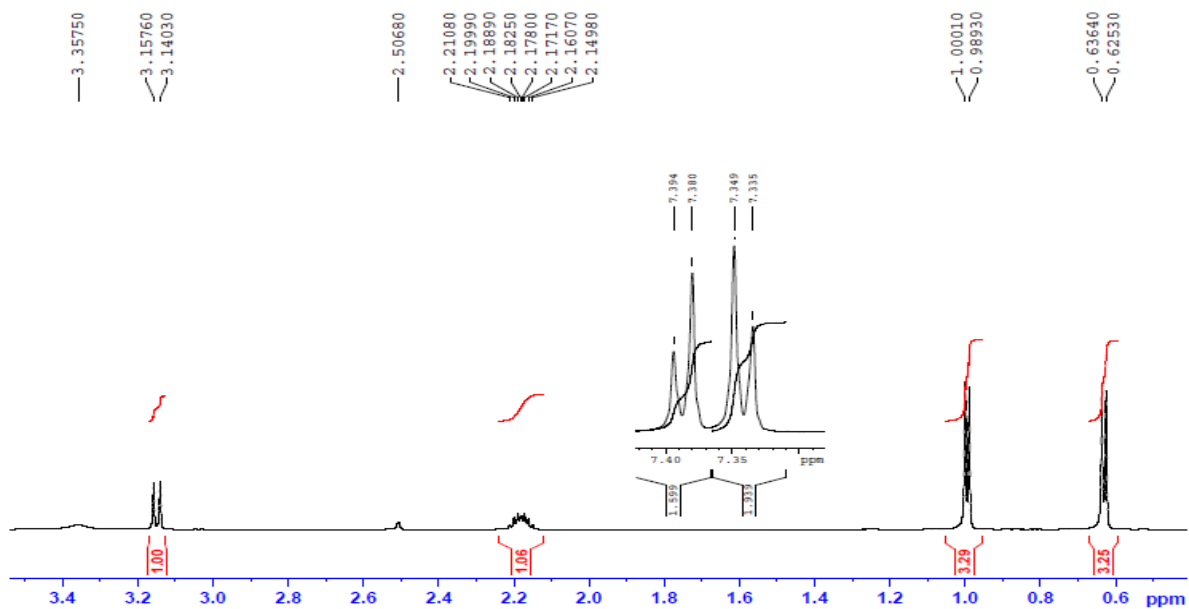

Figure S10: Proton NMR of compound XII

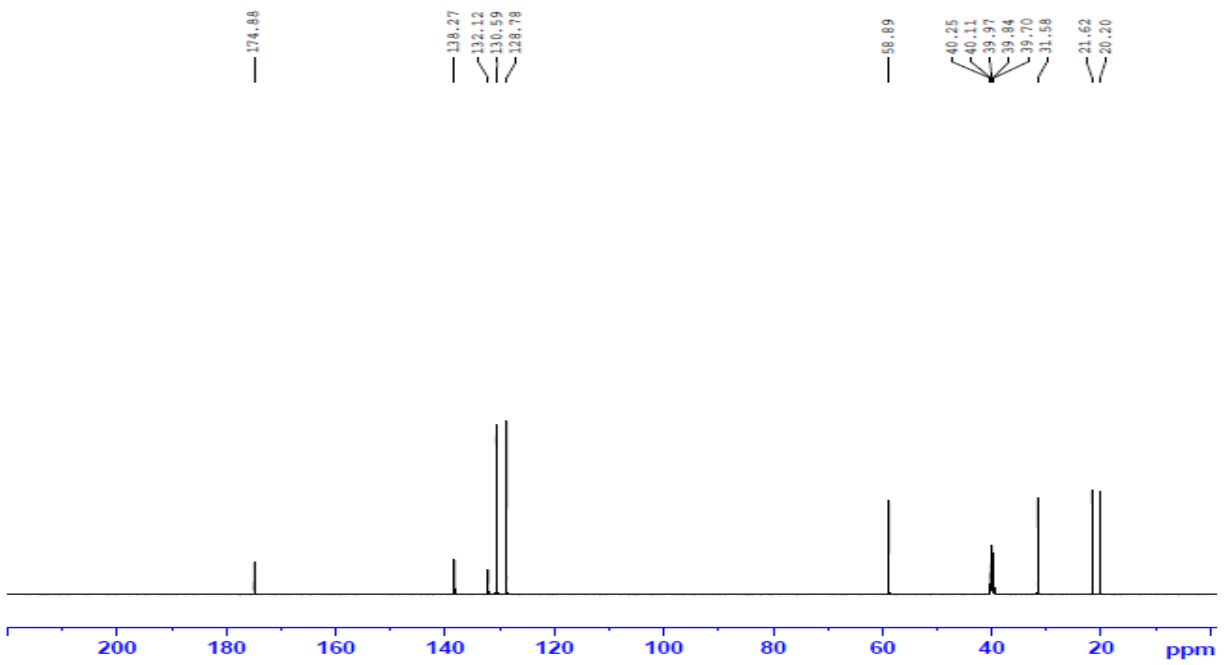

**Figure S11: Carbon-13 NMR of compound XII**

wasim p22

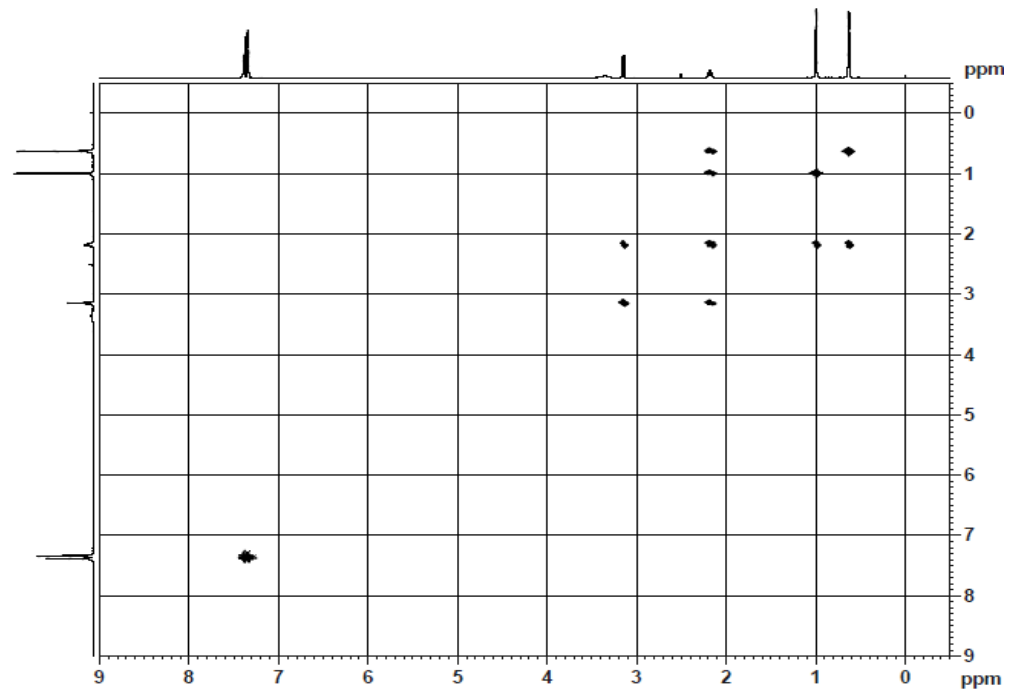

wasim p22

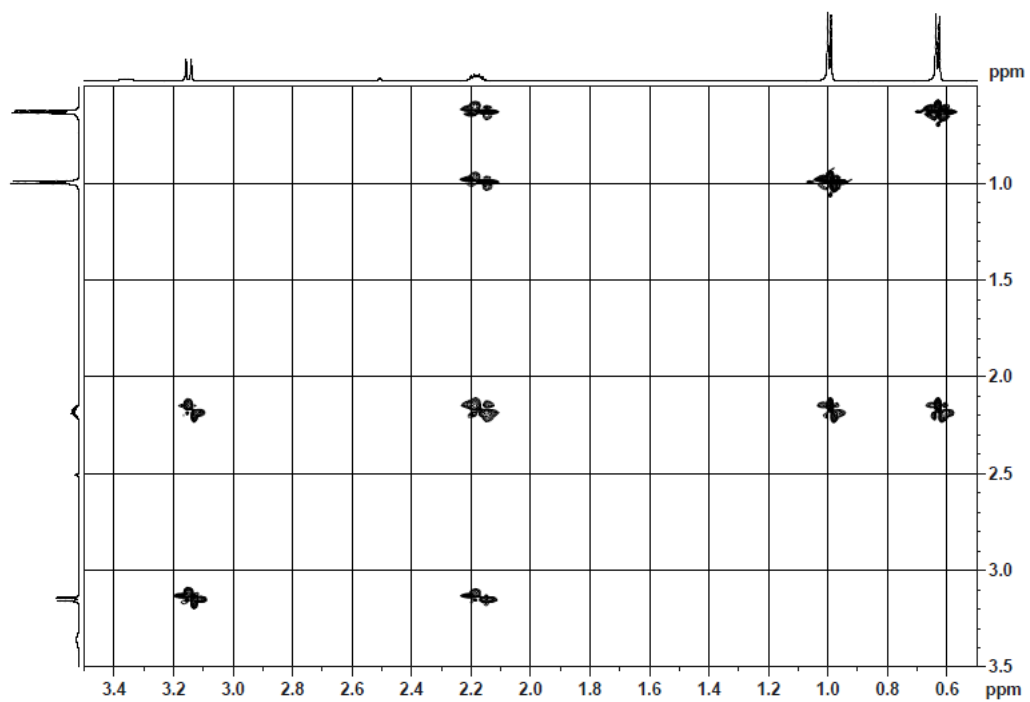

**Figure S12:** COSY correlation of compound XII

wasim p22

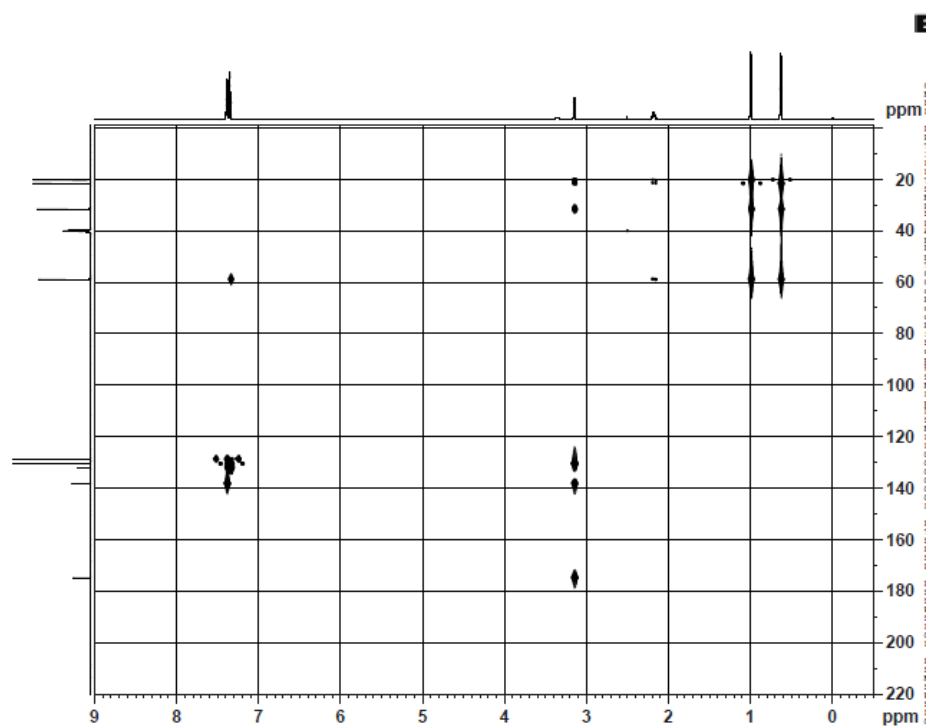

wasim p22

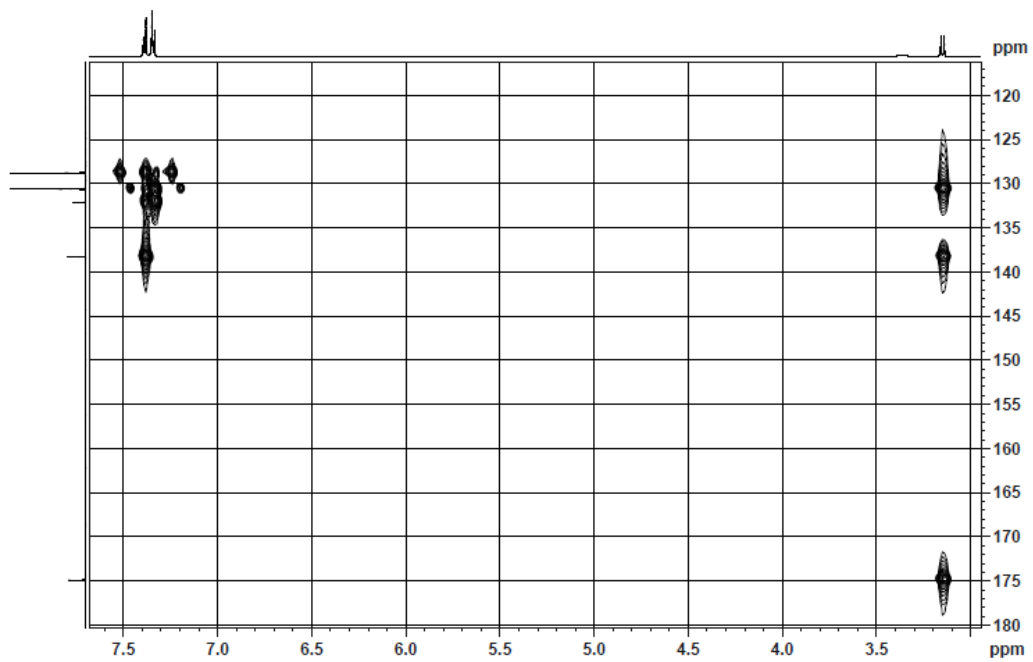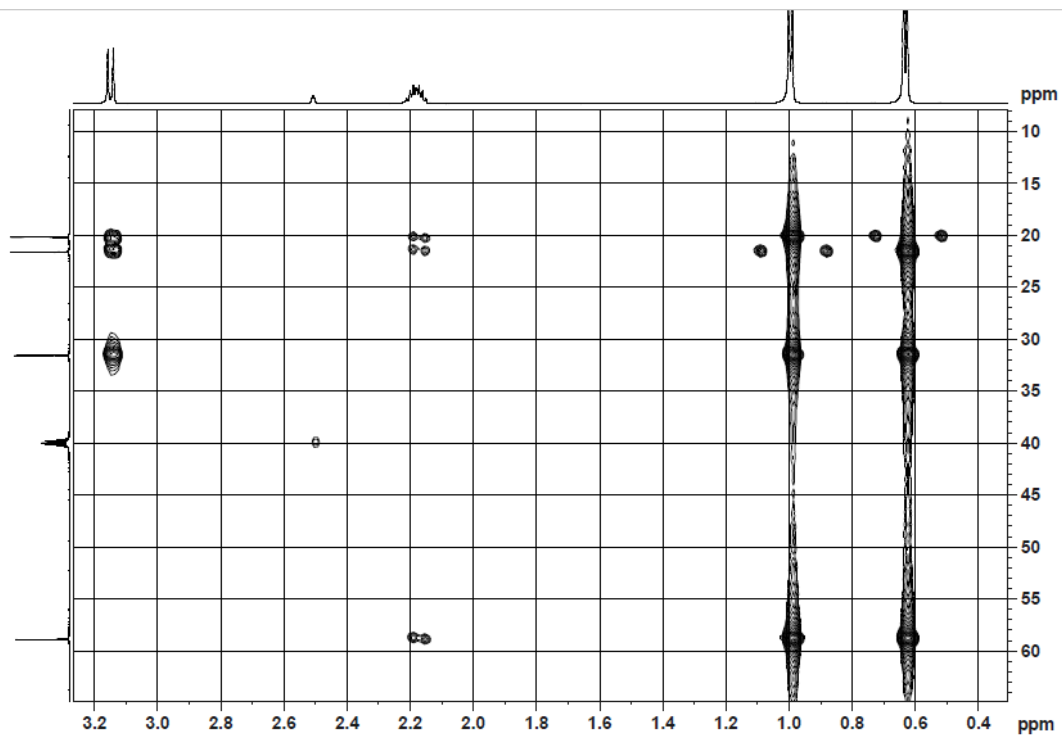

**Figure S13:** HMBC correlation of compound XII
